# Supplementary material
Source: PubMed Central journal article supplement (PMC11424913)
Supplement: jmcp.2024.30.10.1136_s001.pdf [file jmcp.2024.30.10.1136_s001.pdf]

## **SUPPLEMENTARY MATERIALS**

### **A real-world study of persistence and adherence to prescription medications in patients with chronic idiopathic constipation in the United States**

**Short title:** Patient persistence and adherence to CIC prescription medications

Brooks D. Cash, MD; Mei Lu, MD; Anthony Lembo, MD; Paul Feuerstadt, MD; Linda Nguyen, MD; Emi Terasawa, PhD; Rajeev Ayyagari, PhD; Shawn Du, PhD; Selina Pi, BSE; Ben Westermeyer, BA; Brian Terreri, PharmD; Mena Boules, MD; Baharak Moshiree, MD, MSc

**SUPPLEMENTARY FIGURE 1** Participant Selection Algorithm for Patients Who Were Receiving Prucalopride, Lubiprostone, Linaclotide, or Plecanatide for Comparative Analysis

**SUPPLEMENTARY TABLE 1** National Drug Codes for Treatments of Interest

**SUPPLEMENTARY TABLE 2** ICD-10-CM Constipation-Related Diagnosis Codes Used for Inclusion Criteria

**SUPPLEMENTARY TABLE 3** Diagnosis, Procedure, and Drug Codes for Exclusion Criteria

**SUPPLEMENTARY TABLE 4** Summary of Tablet Strengths at the Index Date

**SUPPLEMENTARY TABLE 5** Adjusted Comparison of PDC  $\geq 80\%$  Across Lubiprostone, Linaclotide, and Plecanatide Relative to Prucalopride During the Follow-Up Period

## Supplementary Figures

### Supplementary Figure 1 Participant Selection Algorithm for Patients Who Were Receiving Prucalopride, Lubiprostone, Linaclotide, or Plecanatide for Comparative Analysis

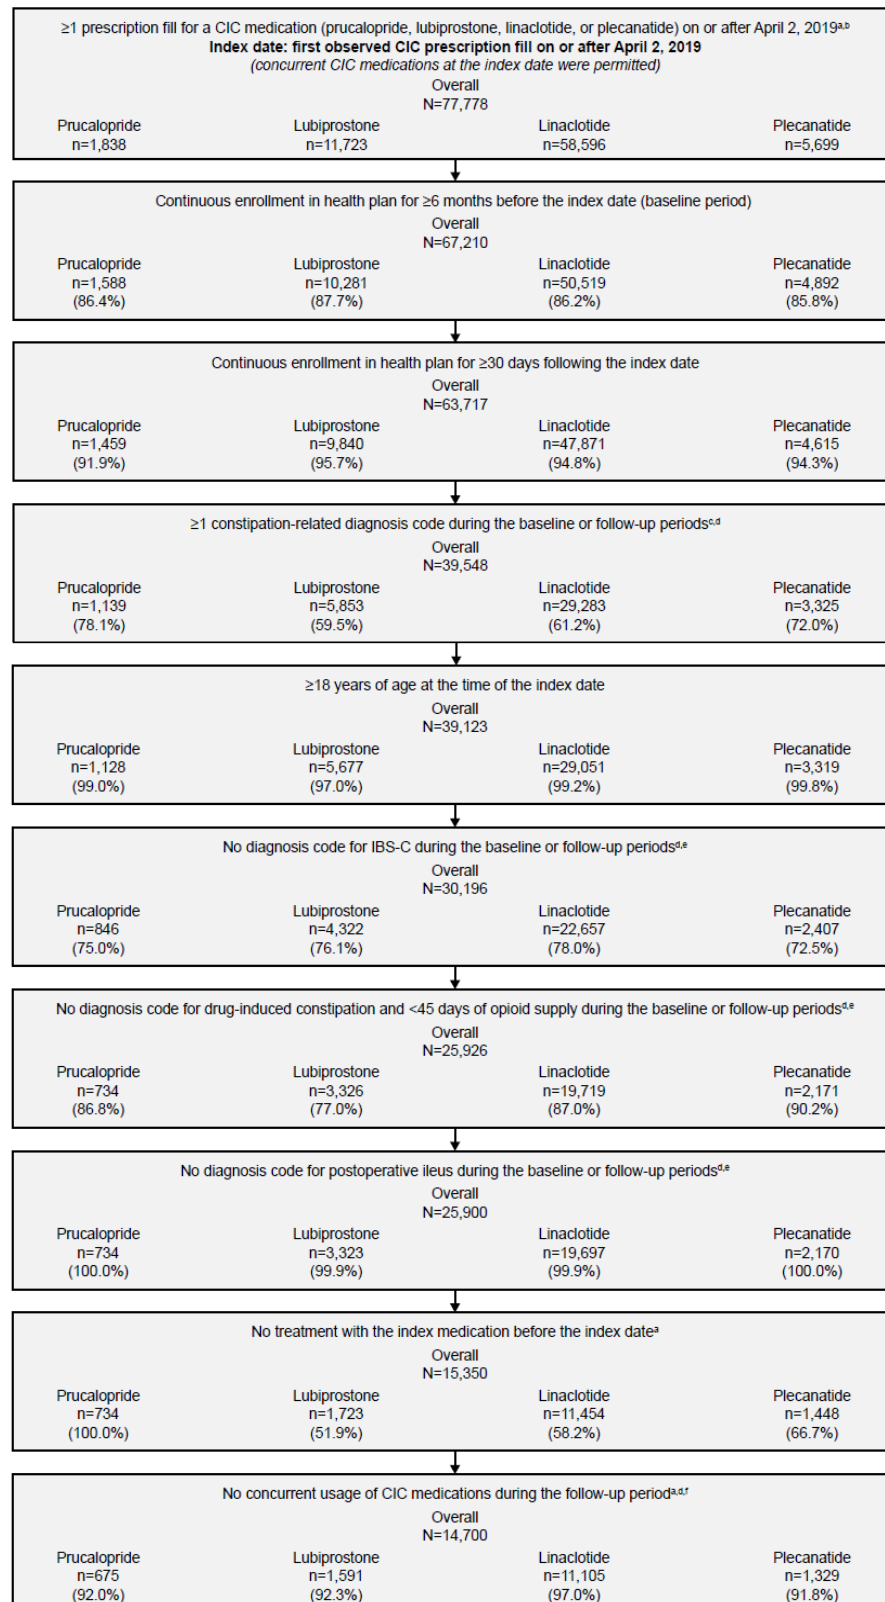

<sup>a</sup>See Supplementary Table 1 for the National Drug Codes used to identify prucalopride, lubiprostone, linaclotide, and plecanatide prescription fills.

<sup>b</sup>Before the final step in the flowchart (in which patients with concurrent usage of constipation medications [prucalopride, lubiprostone, linaclotide, or plecanatide] during the follow-up period were excluded), some patients may have been included in more than one index treatment group. This occurred if a patient used more than one constipation medication (prucalopride, lubiprostone, linaclotide, or plecanatide) on the index date. As a result, the overall sample counts may not equal the sum of the index treatment sample counts before the final step.

<sup>c</sup>See Supplementary Table 2 for ICD-10-CM codes used to identify constipation-related diagnoses.

<sup>d</sup>The follow-up period was defined as the period from the index date to the end of continuous eligibility.

<sup>e</sup>See Supplementary Table 3 for ICD-10-CM and GPI codes used to identify irritable bowel syndrome with constipation, drug-induced constipation, opioid use, and postoperative ileus.

<sup>f</sup>Concurrent usage is defined as having an overlap in days supply of a constipation medication (prucalopride, lubiprostone, linaclotide, or plecanatide) with the index treatment for at least one day during the follow-up period.

CIC=chronic idiopathic constipation; GPI=Generic Product Identifier; IBS-C=irritable bowel syndrome with constipation; ICD-10-CM=International Classification of Diseases, Tenth Revision, Clinical Modification.

## Supplementary Tables

### Supplementary Table 1 National drug codes for treatments of interest

| Treatment generic name | NDC                                                                                                                                                                                                                                                                                                               |
|------------------------|-------------------------------------------------------------------------------------------------------------------------------------------------------------------------------------------------------------------------------------------------------------------------------------------------------------------|
| Prucalopride           | 54092054601, 54092054701, 54092054702,<br>54092054703                                                                                                                                                                                                                                                             |
| Lubiprostone           | 00254302802, 00254302902, 16590047128,<br>16590047130, 16590047160, 16590047172,<br>16590047190, 16590062230, 16590062260,<br>16590062262, 16590062290, 35356050060,<br>47463010660, 54868597100, 54868615300,<br>55048010660, 63629459801, 63629639801,<br>64764008060, 64764024010, 64764024060,<br>68151500306 |
| Linacotide             | 00456120104, 00456120130, 00456120204,<br>00456120230, 00456120304, 00456120330,<br>55700040930                                                                                                                                                                                                                   |
| Plecanatide            | 65649000301, 65649000303, 65649000307,<br>65649000330, 70194000330, 70194010307                                                                                                                                                                                                                                   |

NDC=National Drug Code.

**Supplementary Table 2 ICD-10-CM constipation-related diagnosis codes used for inclusion criteria**

| <b>Diagnosis</b>                | <b>Diagnosis code</b> |
|---------------------------------|-----------------------|
| Unspecified constipation        | K59.00                |
| Slow transit constipation       | K59.01                |
| Outlet dysfunction constipation | K59.02                |
| Chronic idiopathic constipation | K59.04                |
| Other constipation              | K59.09                |

ICD-10-CM=International Classification of Diseases, Tenth Revision, Clinical Modification.

**Supplementary Table 3 Diagnosis, procedure, and drug codes for exclusion criteria**

| <b>Subject</b>                             | <b>ICD-10-CM</b> | <b>HCPCS</b>                                                                                                                                                                                                     | <b>GPI</b> |
|--------------------------------------------|------------------|------------------------------------------------------------------------------------------------------------------------------------------------------------------------------------------------------------------|------------|
| Irritable bowel syndrome with constipation | K58.1            | –                                                                                                                                                                                                                | –          |
| Mixed irritable bowel syndrome             | K58.2            | –                                                                                                                                                                                                                | –          |
| Irritable bowel syndrome without diarrhea  | K58.9            | –                                                                                                                                                                                                                | –          |
| Drug-induced constipation                  | K59.03           | –                                                                                                                                                                                                                | –          |
| Opioids                                    | –                | J0745, J2270, J2271, J2275, S0093, J3010, J1170, S0092, J1960, J2175, J2180, J1230, S0109, J2140, J0592, J0595, S0009, S0012, J2300, J3070, J0570, J0571, J0572, J0573, J0574, J0575, Q9991, Q9992, Q0167, Q0168 | 65x        |
| Postprocedural intestinal obstruction      | K91.3x           | –                                                                                                                                                                                                                | –          |

GPI=Generic Product Identifier; HCPCS=Healthcare Common Procedure Coding System; ICD-10-CM=International Classification of Diseases, Tenth Revision, Clinical Modification.

**Supplementary Table 4 Summary of tablet strengths at the index date**

| <b>Tablet strength, n (%)</b> | <b>Prucalopride<br/>(n=675)</b> | <b>Lubiprostone<br/>(n=1,591)</b> | <b>Linaclotide<br/>(n=11,105)</b> | <b>Plecanatide<br/>(n=1,329)</b> | <b>All patients<br/>(N=14,700)</b> |
|-------------------------------|---------------------------------|-----------------------------------|-----------------------------------|----------------------------------|------------------------------------|
| <b>Prucalopride</b>           |                                 |                                   |                                   |                                  |                                    |
| 1 mg                          | 90 (13.3)                       | –                                 | –                                 | –                                | 90 (0.6)                           |
| 2 mg                          | 585 (86.7)                      | –                                 | –                                 | –                                | 585 (4.0)                          |
| <b>Lubiprostone</b>           |                                 |                                   |                                   |                                  |                                    |
| 8 µg                          | –                               | 651 (40.9)                        | –                                 | –                                | 651 (4.4)                          |
| 24 µg                         | –                               | 940 (59.1)                        | –                                 | –                                | 940 (6.4)                          |
| <b>Linaclotide</b>            |                                 |                                   |                                   |                                  |                                    |
| 72 µg                         | –                               | –                                 | 3,376 (30.4)                      | –                                | 3,376 (23.0)                       |
| 145 µg                        | –                               | –                                 | 5,860 (52.8)                      | –                                | 5,860 (39.9)                       |

|             |   |   |              |               |              |
|-------------|---|---|--------------|---------------|--------------|
| 290 µg      | – | – | 1,865 (16.8) | –             | 1,865 (12.7) |
| Multiple    | – | – | 4 (<0.1)     | –             | 4 (<0.1)     |
| Plecanatide |   |   |              |               |              |
| 3 mg        | – | – | –            | 1,329 (100.0) | 1,329 (9.0)  |



**Supplementary Table 5 Adjusted Comparison of PDC  $\geq$ 80% Across Lubiprostone, Linaclotide, and Plecanatide Relative to Prucalopride During the Follow-Up Period**

|                                                     | <b>PDC <math>\geq</math>80%<sup>a</sup></b> |               |                 |
|-----------------------------------------------------|---------------------------------------------|---------------|-----------------|
|                                                     | <b>(n=8,833)</b>                            |               |                 |
|                                                     | <b>Odds ratio<sup>b</sup></b>               | <b>95% CI</b> | <b><i>P</i></b> |
| Index treatment (reference: prucalopride)           |                                             |               |                 |
| Lubiprostone                                        | 0.52                                        | 0.40-0.69     | <0.001          |
| Linaclotide                                         | 0.73                                        | 0.58-0.93     | 0.009           |
| Plecanatide                                         | 0.70                                        | 0.53-0.93     | 0.015           |
| Health care resource use during the baseline period |                                             |               |                 |
| Any constipation-related inpatient visits           | 1.00                                        | 0.63-1.58     | 0.996           |
| Any constipation-related ED visits                  | 0.86                                        | 0.69-1.08     | 0.207           |
| Number of gastroenterologist visits                 | 1.09                                        | 1.01-1.18     | 0.025           |

|                                                  |      |           |       |
|--------------------------------------------------|------|-----------|-------|
| Number of constipation-related outpatient visits | 1.01 | 0.98-1.03 | 0.566 |
| Treatments during the baseline period            |      |           |       |
| Lubiprostone                                     | 1.28 | 0.70-2.33 | 0.426 |
| Linaclotide                                      | 0.95 | 0.54-1.67 | 0.865 |
| Plecanatide                                      | 0.78 | 0.25-2.48 | 0.675 |
| Use of any prescription laxatives                | 1.16 | 1.02-1.32 | 0.026 |

Statistical significance set at  $P < 0.05$ .

<sup>a</sup>Evaluated for patients who had continuous enrollment for at least 6 months after the index date. PDC was calculated by dividing the patient's total days of supply of index treatment prescriptions filled during the first 6 months of follow-up by the number of days in a 6-month time frame (182 days). Accounting for stockpiling, any days of supply that fell outside of the first 6 months of follow-up were excluded.

<sup>b</sup>Odds ratios were calculated using logistic regression. An odds ratio greater than 1 for a categorical variable (A vs B) indicates the proportionally higher odds of the outcome occurring in group A compared with group B. An odds ratio greater than 1 for a continuous variable indicates the proportionally higher odds of the outcome occurring for a unit increase in the level of the variable.

ED=emergency department; PDC = proportion of days covered.
